# Supplementary material
Source: publisher site journal article supplement (https://www.dovepress.com/article/322292)
Supplement: Supplementary file 1 [file get_supplementary_file.php]

**Supplemental Appendix**

**Figure S1.** Site Outliers for Co-Primary Endpoint of 2-hour Pain Freedom


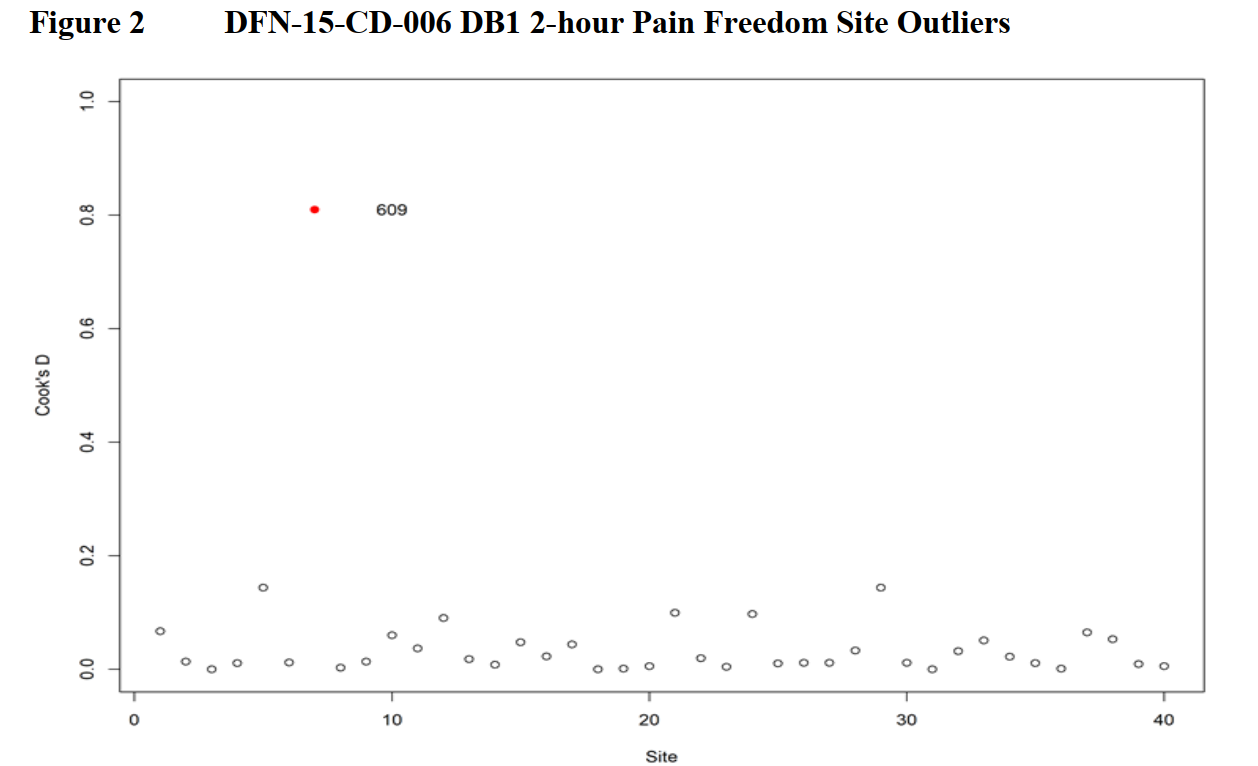


**Figure S2.** Freedom From Nausea, Photophobia, and Phonophobia at Prespecified Timepoints Post-dose Using LOCF, FAS†

FAS, full analysis set; LOCF, last observation carried forward; Pbo, placebo.

†Analysis includes outlier site.

*Denotes statistical significance

**Figure S3.** Proportion of Patients With Headache Pain Relief by Post-dose Timepoint Using LOCF, FAS†

*P*=0.245

*P*=0.474

*P*=0.492

*P*=0.010

*P*=0.006

*P*=0.038

*P*=0.024

*P*=1.000

n=257 n=275

n=271 n=281

n=239 n=247

n=254 n=269

n=261 n=278

n=262 n=279

n=267 n=280

LOCF, last observation carried forward.

†Analysis includes outlier site.

**Table S1**. Co-Primary Efficacy Analysis: Headache Pain Freedom and MBS Freedom 2 Hours Post-dose†

|  | **Placebo**  **n=280** | **Celecoxib oral solution**  **n=287** | **Placebo**  **n=280** | **Celecoxib oral solution**  **n=287** |
| --- | --- | --- | --- | --- |
|  | **LOCF** | | **Observed** | |
| **Headache pain freedom at 2 hours post-dose** | | | | |
| Assessments at 2 hours post-dose, n | 267 | 280 | 256 | 275 |
| Number of responses | 69 | 92 | 63 | 89 |
| Proportion (95% CI), % | 25.8 (20.7, 31.5) | 32.9 (27.4, 38.7) | 24.6 (19.5, 30.4) | 32.4 (26.9, 38.2) |
| *P*-value | - | 0.075 | - | 0.055 |
| Odds ratio (95% CI) | - | 1.4 (1.0, 2.0) | - | 1.5 (1.0, 2.1) |
| **Absence of screening MBS at 2 hours post-dose** | | | | |
| Assessments at 2 hours post-dose, n | 231 | 241 | 223 | 236 |
| Number of responses | 104 | 142 | 99 | 138 |
| Proportion (95% CI), % | 45.0 (38.5, 51.7) | 58.9 (52.4, 65.2) | 44 (37.8, 51.2) | 58.5 (51.9, 64.8) |
| *P*-value | - | 0.003 | - | 0.003 |
| Odds ratio (95% CI) | - | 1.8 (1.2, 2.5) | - | 1.8 (1.2, 2.6) |

CI, confidence interval; LOCF, last observation carried forward; MBS, most bothersome symptom.

†Analysis includes outlier site.
